# Supplementary material
Source: PubMed Central journal article supplement (PMC2735933)
Supplement: JCI39162sd.pdf [file JCI39162sd.pdf]

## SUPPLEMENTAL DATA

**SIRT3 blocks cardiac hypertrophic response by augmenting the Foxo3a-dependent anti-oxidant defense mechanism of the cells.**

Nagalingam R. Sundaresan, Madhu Gupta, Gene Kim Senthilkumar B. Rajamohan, Ayman Isbatan and Mahesh P. Gupta

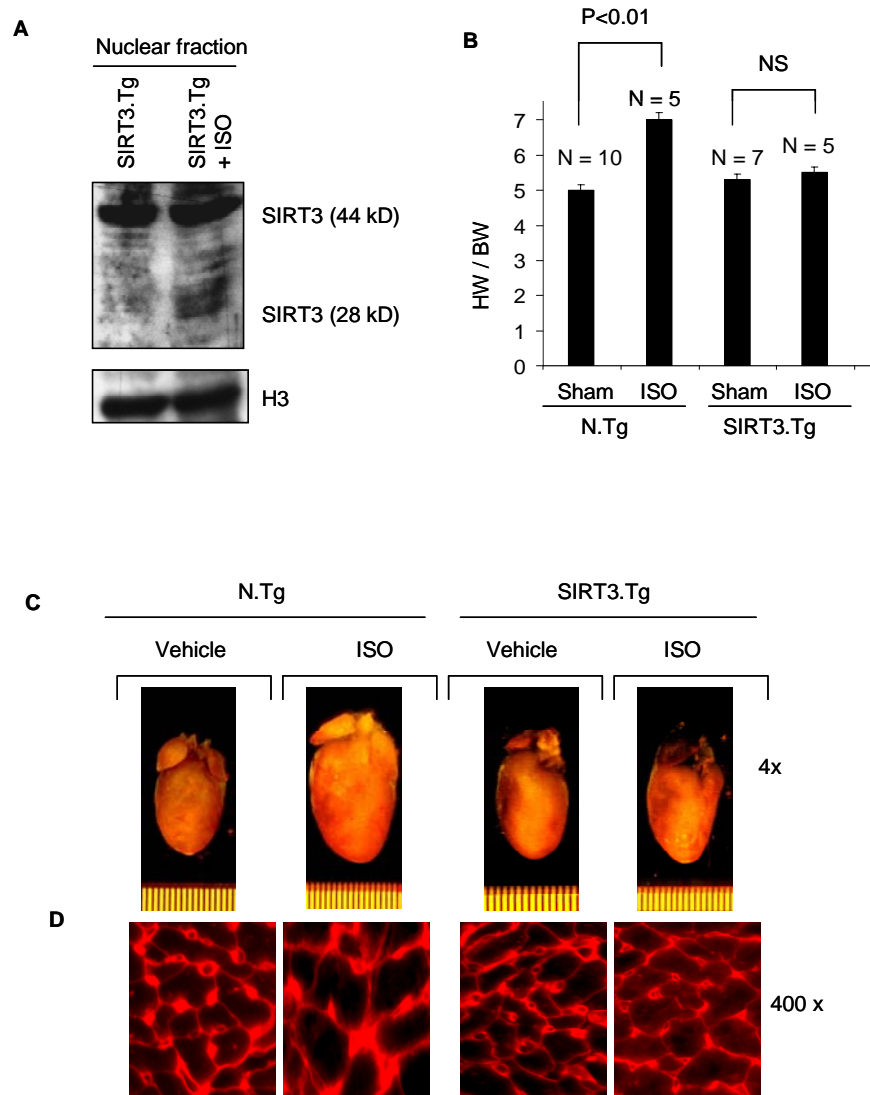

**Figure S1**

**Figure S1:** SIRT3 transgenic mice are protected from ISO-mediated cardiac hypertrophy.

**(A)** Analysis of SIRT3 levels in nuclear fraction of SIRT3-Tg mice subjected to ISO-mediated

cardiac hypertrophy (8.7 mg/kg/day for 7 days). Note that the nuclear expression of short form (28 kD) of SIRT3 was elevated after ISO-treatment of mice. **(B)** Change in heart weight (HW) and body weight (BW) of N-Tg and SIRT3-Tg mice subjected to chronic infusion of isoproterenol (ISO). **(C)** Representative hearts of N-Tg and SIRT3-Tg mice subjected to ISO-mediated cardiac hypertrophy showing increased heart size of N-Tg, but not of SIRT3-g mice. **(D)** Hearts sections stained with wheat germ agglutinin to show increased myocyte size in N-Tg compared to SIRT3-Tg mice subjected to ISO-mediated hypertrophy.
